# Supplementary material for: Ultrasonication induced adsorption of carbon nanotubes onto electrospun nanofibers with improved thermal and electrical performances
Source: Royal Society of Chemistry journal article supplement (doi:10.1039/c2jm00035k), 2012-01-01
Supplement: c2jm00035k.pdf [file c2jm00035k.pdf]

## **Ultrasonication induced adsorption of carbon nanotubes onto electrospun nanofibers with improved thermal and electrical performances**

*Jiefeng Gao, Mingjun Hu, Robert. K. Y. Li\**

Department of Physics and Materials Science, City University of Hong Kong

E-mail address: aprkyl@cityu.edu.hk

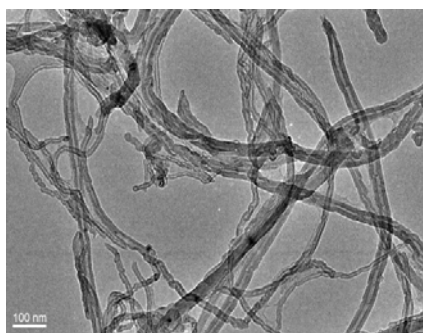

Fig. S1 TEM image of CNTs dispersed in water under ultrasonication
